# Supplementary material for: Study of electrocatalytic CO 2 reduction using tin-oxalate organometallic frameworks doped with cadmium
Source: Royal Society of Chemistry journal article supplement (doi:10.1039/d4ta03335c), 2024-12-04
Supplement: d4ta03335c1.pdf [file d4ta03335c1.pdf]

## Study of electrocatalytic CO<sub>2</sub> reduction using tin-oxalate organometallic frameworks doped with cadmium

Adrián Farid Bustos-Jimenez<sup>a,b</sup>, María Elena Manríquez-Ramírez<sup>b</sup>, Francisco Javier Tzompantzi-Morales<sup>c</sup>, Rodrigo Andrés Espinosa Flores<sup>b</sup> and Martin Daniel Trejo-Valdez<sup>b\*</sup>

<sup>1</sup>Queen Mary University of London, Division of Chemical Engineering, School of Engineering and Materials Science, Queen Mary University of London, Mile End Road, London E1 4NS, UK.

<sup>2</sup>Instituto Politécnico Nacional-ESIQIE, Laboratorio de investigación en nanomateriales y energías limpias, Edificio Z-5, P.B., Zacatenco, Gustavo A. Madero, Ciudad de México, 07738, México.

<sup>3</sup>Departamento de Química, Área de Catálisis, Universidad Autónoma Metropolitana – Iztapalapa, Av. San Rafael Atlixco No. 189, C.P. 09340 Ciudad de México, México.

\*Corresponding author: [mtrejov@ipn.mx](mailto:mtrejov@ipn.mx)

\*\*Corresponding author: [mmanriquez@ipn.mx](mailto:mmanriquez@ipn.mx)

### 1 Diffraction Data

Table S1. DRX indexed peaks and crystallographic data of CdOx MOF compound.

| $^{\circ}2\theta$ | Peak height | FWHM   | H | k | l | d Å    | Chemical Form.<br>Cd(C <sub>2</sub> O <sub>4</sub> ) <sub>0.8</sub> |
|-------------------|-------------|--------|---|---|---|--------|---------------------------------------------------------------------|
| 14.68             | 1000        | 0.1011 | 0 | 1 | 0 | 6.0358 | Space group:                                                        |
| 15.42             | 249.1       | 0.1011 | 1 | 0 | 1 | 5.7459 | P m n a (53)                                                        |
| 17.54             | 292.5       | 0.1213 | 0 | 1 | 1 | 5.0567 | Crystal system:                                                     |
| 19.17             | 58.4        | 0.1011 | 0 | 0 | 2 | 4.6289 | Orthorhombic                                                        |
| 21.38             | 25          | 0.101  | 1 | 1 | 1 | 4.1561 | Cell parameters:                                                    |
| 24.27             | 343.8       | 0.1213 | 0 | 1 | 2 | 3.6669 | a= 7.3309 Å                                                         |
| 27.14             | 36.8        | 0.1415 | 1 | 1 | 2 | 3.2852 | b= 6.0368 Å                                                         |
| 28.48             | 32.1        | 0.1213 | 2 | 1 | 0 | 3.1341 | c= 9.2578 Å                                                         |
| 29.58             | 135.2       | 0.1011 | 0 | 2 | 0 | 3.0199 | $\alpha = \beta = \gamma = 90^{\circ}$                              |
| 30.1              | 51.2        | 0.1415 | 2 | 1 | 1 | 2.9688 |                                                                     |
| 31.14             | 259.1       | 0.1213 | 2 | 0 | 2 | 2.8718 |                                                                     |
| 31.43             | 240.9       | 0.0809 | 1 | 0 | 3 | 2.846  |                                                                     |
| 31.53             | 117.5       | 0.0809 | 1 | 0 | 3 | 2.8377 |                                                                     |
| 32.57             | 11.8        | 0.1011 | 0 | 1 | 3 | 2.7494 |                                                                     |
| 34.55             | 59.6        | 0.1213 | 2 | 1 | 2 | 2.596  |                                                                     |
| 34.85             | 109.2       | 0.1011 | 1 | 1 | 3 | 2.5746 |                                                                     |
| 35.48             | 12.3        | 0.1011 | 0 | 2 | 2 | 2.5299 |                                                                     |
| 37.61             | 67.5        | 0.1415 | 1 | 2 | 2 | 2.3916 |                                                                     |
| 37.72             | 46.4        | 0.1415 | 1 | 1 | 2 | 2.3851 |                                                                     |
| 38.06             | 73.8        | 0.1011 | 3 | 0 | 1 | 2.3643 |                                                                     |

Table S1. DRX indexed peaks and crystallographic data of CdOx MOF compound (cont.)

| $^{\circ}2\theta$ | Peak height | FWHM   | H | k | l | d Å    | Chemical Form.<br>Cd(C <sub>2</sub> O <sub>4</sub> ) <sub>0.8</sub> |
|-------------------|-------------|--------|---|---|---|--------|---------------------------------------------------------------------|
| 39.98             | 46          | 0.1415 | 2 | 2 | 1 | 2.2551 |                                                                     |
| 41.01             | 37.9        | 0.1213 | 3 | 1 | 1 | 2.201  |                                                                     |
| 41.77             | 8           | 0.1011 | 0 | 1 | 4 | 2.1626 |                                                                     |
| 43.47             | 19.3        | 0.182  | 2 | 2 | 2 | 2.0819 |                                                                     |
| 43.66             | 91.3        | 0.1618 | 1 | 1 | 4 | 2.0734 |                                                                     |
| 44.5              | 10.9        | 0.1213 | 3 | 1 | 2 | 2.036  |                                                                     |
| 46.25             | 44.7        | 0.1213 | 0 | 3 | 1 | 1.9629 |                                                                     |
| 47.42             | 55.4        | 0.1011 | 3 | 0 | 3 | 1.9173 |                                                                     |
| 47.54             | 28.6        | 0.1011 | 3 | 0 | 3 | 1.9126 |                                                                     |
| 49.71             | 24.3        | 0.1213 | 0 | 2 | 4 | 1.8342 |                                                                     |
| 49.9              | 40.2        | 0.1415 | 3 | 1 | 3 | 1.8278 |                                                                     |
| 50.03             | 21.5        | 0.1415 | 3 | 1 | 3 | 1.8233 |                                                                     |
| 50.82             | 39.2        | 0.1011 | 1 | 0 | 5 | 1.7967 |                                                                     |
| 50.98             | 50.9        | 0.1618 | 1 | 0 | 5 | 1.7915 |                                                                     |
| 51.23             | 50.5        | 0.182  | 1 | 3 | 2 | 1.7831 |                                                                     |
| 51.37             | 27.7        | 0.1415 | 1 | 2 | 4 | 1.7789 |                                                                     |
| 52.01             | 26.4        | 0.182  | 2 | 3 | 0 | 1.7583 |                                                                     |
| 52.12             | 22          | 0.1618 | 3 | 2 | 2 | 1.7548 |                                                                     |
| 52.79             | 33.9        | 0.1415 | 4 | 1 | 0 | 1.734  |                                                                     |
| 52.92             | 22.9        | 0.2224 | 2 | 3 | 1 | 1.7301 |                                                                     |
| 53.18             | 36.2        | 0.1213 | 4 | 1 | 1 | 1.7223 |                                                                     |
| 53.32             | 18.1        | 0.1213 | 4 | 1 | 1 | 1.7182 |                                                                     |
| 53.74             | 10.5        | 0.1011 | 4 | 0 | 2 | 1.7057 |                                                                     |
| 56.02             | 11.1        | 0.1415 | 2 | 2 | 4 | 1.6415 |                                                                     |
| 56.84             | 22.7        | 0.1618 | 3 | 1 | 4 | 1.6199 |                                                                     |
| 59.88             | 22.2        | 0.2224 | 0 | 0 | 6 | 1.5448 |                                                                     |
| 62.02             | 9.8         | 0.1213 | 0 | 1 | 6 | 1.4964 |                                                                     |
| 62.4              | 35.4        | 0.2831 | 0 | 4 | 1 | 1.4881 |                                                                     |
| 62.55             | 21.9        | 0.1618 | 1 | 3 | 4 | 1.485  |                                                                     |
| 62.91             | 13.9        | 0.1415 | 3 | 0 | 5 | 1.4773 |                                                                     |
| 63.27             | 21.2        | 0.182  | 3 | 3 | 2 | 1.4699 |                                                                     |
| 65.57             | 10.2        | 0.1011 | 2 | 0 | 6 | 1.4236 |                                                                     |
| 67.61             | 11.6        | 0.1213 | 2 | 1 | 6 | 1.3857 |                                                                     |

Table S2. DRX indexed peaks and crystallographic data of SnOxal MOF.

| $^{\circ}2\theta$ | Peak height | FWHM   | h  | k | l  | d | Chemical Formula:<br>Sn(C <sub>2</sub> O <sub>4</sub> ) <sub>0.45</sub> (DMF) <sub>1.51</sub> |
|-------------------|-------------|--------|----|---|----|---|-----------------------------------------------------------------------------------------------|
| 19.24             | 445.9       | 0.1011 | 1  | 1 | 0  |   | Space group C 1 2/c 1 (15)                                                                    |
| 19.64             | 240.6       | 0.1213 | 1  | 1 | -1 |   | Crystal system: Monoclinic                                                                    |
| 20.96             | 108.6       | 0.1415 | 2  | 0 | 0  |   | Cell parameters:                                                                              |
| 22.37             | 1000        | 0.1011 | 2  | 0 | -2 |   | a= 10.3768 Å                                                                                  |
| 26.62             | 363         | 0.2426 | 1  | 1 | 1  |   | b= 5.5051 Å                                                                                   |
| 27.45             | 469.7       | 0.182  | -1 | 1 | 2  |   | c= 8.2393 Å                                                                                   |
| 30.91             | 164.6       | 0.1011 | 3  | 1 | -1 |   | $\alpha = \gamma = 90^{\circ}; \beta = 125.092^{\circ}$                                       |
| 31.7              | 41.3        | 0.0607 | 3  | 1 | -2 |   |                                                                                               |
| 34.7              | 170.9       | 0.1011 | 4  | 0 | -2 |   |                                                                                               |
| 35.25             | 140.2       | 0.1415 | 0  | 2 | 1  |   |                                                                                               |
| 35.34             | 226.1       | 0.0809 | 0  | 2 | 1  |   |                                                                                               |
| 35.71             | 56.2        | 0.1213 | 3  | 1 | 0  |   |                                                                                               |
| 37.02             | 118.5       | 0.1618 | 2  | 2 | -1 |   |                                                                                               |
| 37.68             | 219.1       | 0.1618 | 3  | 1 | -3 |   |                                                                                               |
| 37.79             | 230         | 0.0809 | 3  | 1 | -3 |   |                                                                                               |
| 38.72             | 74.5        | 0.0809 | -1 | 1 | 3  |   |                                                                                               |
| 42.65             | 35          | 0.1011 | 4  | 0 | 0  |   |                                                                                               |
| 45.09             | 54.7        | 0.0809 | -2 | 0 | 4  |   |                                                                                               |
| 45.34             | 60.2        | 0.182  | -2 | 0 | 4  |   |                                                                                               |
| 45.47             | 88.5        | 0.1213 | 2  | 2 | 1  |   |                                                                                               |
| 46.81             | 70          | 0.1011 | 4  | 0 | -4 |   |                                                                                               |
| 46.95             | 70          | 0.1011 | -2 | 2 | 3  |   |                                                                                               |
| 47.13             | 50.3        | 0.1213 | 5  | 1 | -2 |   |                                                                                               |
| 49.58             | 20          | 0.1011 | 4  | 2 | -2 |   |                                                                                               |
| 51.09             | 183.3       | 0.3235 | 4  | 2 | -3 |   |                                                                                               |
| 51.65             | 36          | 0.1011 | -1 | 1 | 4  |   |                                                                                               |
| 52.62             | 75.1        | 0.4044 | 0  | 2 | 3  |   |                                                                                               |
| 54.52             | 26.6        | 0.1011 | 0  | 0 | 4  |   |                                                                                               |
| 55.89             | 27          | 0.1011 | 3  | 1 | 2  |   |                                                                                               |
| 61.45             | 39.9        | 0.1213 | 3  | 3 | -3 |   |                                                                                               |
| 64.53             | 77.1        | 0.0404 | 6  | 2 | -2 |   |                                                                                               |
| 66.31             | 40          | 0.1011 | 6  | 0 | 0  |   |                                                                                               |
| 68.51             | 25          | 0.1011 | 5  | 3 | -2 |   |                                                                                               |

Table S3. DRX indexed peaks and crystallographic data of SnCd<sub>0.25</sub>Ox MOF.

| °2θ   | Peak height | FWHM   | h  | k | l  | Chemical Formula<br>SnCd <sub>0.011</sub> (C <sub>2</sub> O <sub>4</sub> ) <sub>0.45</sub> (DMF) <sub>1.23</sub> |
|-------|-------------|--------|----|---|----|------------------------------------------------------------------------------------------------------------------|
| 19.22 | 1000        | 0.1213 | 1  | 1 | 0  | Space group C 1 2/c 1 (15)                                                                                       |
| 19.62 | 159.3       | 0.1213 | 1  | 1 | -1 | Crystal system: Monoclinic                                                                                       |
| 20.96 | 126.8       | 0.1011 | 2  | 0 | 0  | Cell parameters:                                                                                                 |
| 22.37 | 258.9       | 0.1011 | 2  | 0 | -2 | a= 10.348 Å                                                                                                      |
| 26.46 | 208.6       | 0.6875 | 0  | 0 | 2  | b= 5.489 Å                                                                                                       |
| 26.6  | 309.3       | 0.2022 | 1  | 1 | 1  | c = 8.218 Å                                                                                                      |
| 27.47 | 284.6       | 0.1618 | -1 | 1 | 2  | α = γ = 90°; β = 125.09 °                                                                                        |
| 30.94 | 39          | 0.1213 | 3  | 1 | -1 |                                                                                                                  |
| 31.7  | 34.3        | 0.1213 | 3  | 1 | -2 |                                                                                                                  |
| 34.69 | 92.1        | 0.1618 | 0  | 2 | 0  |                                                                                                                  |
| 35.22 | 142         | 0.1415 | 0  | 2 | 1  |                                                                                                                  |
| 35.69 | 67          | 0.1011 | 3  | 1 | 0  |                                                                                                                  |
| 36.99 | 143.3       | 0.1618 | 2  | 2 | -1 |                                                                                                                  |
| 37.66 | 100.3       | 0.182  | 3  | 1 | -3 |                                                                                                                  |
| 38.72 | 53.4        | 0.182  | -1 | 1 | 3  |                                                                                                                  |
| 42.61 | 46.1        | 0.1213 | 0  | 0 | 2  |                                                                                                                  |
| 42.73 | 33.2        | 0.2022 | 4  | 0 | 0  |                                                                                                                  |
| 44.4  | 26.2        | 0.0809 | 3  | 1 | 1  |                                                                                                                  |
| 45.08 | 22.4        | 0.1618 | -2 | 0 | 4  |                                                                                                                  |
| 45.31 | 59.9        | 0.1213 | 2  | 2 | 1  |                                                                                                                  |
| 46.97 | 49.4        | 0.182  | -2 | 2 | 3  |                                                                                                                  |
| 47.83 | 35          | 0.121  | 5  | 1 | -3 |                                                                                                                  |
| 49.59 | 30          | 0.1416 | 4  | 2 | -1 |                                                                                                                  |
| 50.93 | 111.8       | 0.2831 | 1  | 1 | 3  |                                                                                                                  |
| 51.05 | 114.6       | 0.4044 | 1  | 3 | 0  |                                                                                                                  |
| 51.19 | 124.8       | 0.2629 | -1 | 3 | 1  |                                                                                                                  |
| 51.59 | 37.4        | 0.4651 | -1 | 1 | 4  |                                                                                                                  |
| 52.59 | 43.5        | 0.182  | 0  | 2 | 3  |                                                                                                                  |
| 54.5  | 30          | 0.1416 | 6  | 0 | -2 |                                                                                                                  |
| 57.03 | 60          | 0.1416 | 5  | 1 | 0  |                                                                                                                  |
| 61.44 | 19.4        | 0.1011 | 1  | 3 | 2  |                                                                                                                  |
| 66.37 | 19.2        | 0.1213 | 7  | 1 | -3 |                                                                                                                  |
| 68.49 | 17.2        | 0.182  | 0  | 4 | 0  |                                                                                                                  |

Table S4. DRX indexed peaks and crystallographic data of SnCd<sub>0.50</sub>Ox MOF.

| $^{\circ}2\theta$ | Peak height | FWHM   | (H k l)  | d Å    | Space Group | Chemical Formula                                                                             |
|-------------------|-------------|--------|----------|--------|-------------|----------------------------------------------------------------------------------------------|
| 9.88              | 493.2       | 0.1011 | (0 0 2)  | 8.9405 | P 21 21 21  | SnCd <sub>0.015</sub> (C <sub>2</sub> O <sub>4</sub> ) <sub>0.55</sub> (DMF) <sub>1.72</sub> |
| 12.54             | 714.6       | 0.0809 | (0 1 2)  | 6.8441 | P 21 21 21  | SnCd <sub>0.015</sub> (C <sub>2</sub> O <sub>4</sub> ) <sub>0.55</sub> (DMF) <sub>1.72</sub> |
| 19.21             | 1000        | 0.1415 | (1 1 0)  | 4.6195 | C 1 2/c 1   | SnCd <sub>0.015</sub> (C <sub>2</sub> O <sub>4</sub> ) <sub>0.44</sub> (DMF) <sub>1.61</sub> |
| 19.61             | 287.9       | 0.1213 | (1 1 -1) | 4.5281 | C 1 2/c 1   | SnCd <sub>0.015</sub> (C <sub>2</sub> O <sub>4</sub> ) <sub>0.44</sub> (DMF) <sub>1.61</sub> |
| 19.85             | 210         | 0.142  | (0 0 4)  | 4.4711 | P 21 21 21  | SnCd <sub>0.015</sub> (C <sub>2</sub> O <sub>4</sub> ) <sub>0.55</sub> (DMF) <sub>1.72</sub> |
| 20.96             | 248         | 0.1415 | (2 0 0)  | 4.2423 | C 1 2/c 1   | SnCd <sub>0.015</sub> (C <sub>2</sub> O <sub>4</sub> ) <sub>0.44</sub> (DMF) <sub>1.61</sub> |
| 22.35             | 464.5       | 0.1213 | (2 0 -2) | 3.9779 | C 1 2/c 1   | SnCd <sub>0.015</sub> (C <sub>2</sub> O <sub>4</sub> ) <sub>0.44</sub> (DMF) <sub>1.61</sub> |
| 23.02             | 228         | 0.1415 | (1 0 3)  | 3.863  | P 21 21 21  | SnCd <sub>0.015</sub> (C <sub>2</sub> O <sub>4</sub> ) <sub>0.55</sub> (DMF) <sub>1.72</sub> |
| 25.22             | 656.2       | 0.1213 | (0 3 1)  | 3.531  | C 1 2/c 1   | SnCd <sub>0.015</sub> (C <sub>2</sub> O <sub>4</sub> ) <sub>0.44</sub> (DMF) <sub>1.61</sub> |
| 25.59             | 708.5       | 0.2426 | (1 1 1)  | 3.2841 | P 21 21 21  | SnCd <sub>0.015</sub> (C <sub>2</sub> O <sub>4</sub> ) <sub>0.55</sub> (DMF) <sub>1.72</sub> |
| 27.46             | 805.1       | 0.2244 | (-1 1 2) | 3.2481 | P 21 21 21  | SnCd <sub>0.015</sub> (C <sub>2</sub> O <sub>4</sub> ) <sub>0.55</sub> (DMF) <sub>1.72</sub> |
| 30.97             | 255.5       | 0.1415 | (3 1 -1) | 2.888  | P 21 21 21  | SnCd <sub>0.015</sub> (C <sub>2</sub> O <sub>4</sub> ) <sub>0.55</sub> (DMF) <sub>1.72</sub> |
| 31.68             | 282         | 0.1415 | (1 1 5)  | 2.8263 | C 1 2/c 1   | SnCd <sub>0.015</sub> (C <sub>2</sub> O <sub>4</sub> ) <sub>0.44</sub> (DMF) <sub>1.61</sub> |
| 33.81             | 180         | 0.1415 | (0 4 0)  | 2.6513 | P 21 21 21  | SnCd <sub>0.015</sub> (C <sub>2</sub> O <sub>4</sub> ) <sub>0.55</sub> (DMF) <sub>1.72</sub> |
| 34.4              | 182.2       | 0.9099 | (1 3 3)  | 2.6072 | P 21 21 21  | SnCd <sub>0.015</sub> (C <sub>2</sub> O <sub>4</sub> ) <sub>0.55</sub> (DMF) <sub>1.72</sub> |
| 34.66             | 280.2       | 0.2022 | (4 0 -2) | 2.5877 | C 1 2/c 1   | SnCd <sub>0.015</sub> (C <sub>2</sub> O <sub>4</sub> ) <sub>0.44</sub> (DMF) <sub>1.61</sub> |
| 34.87             | 122.5       | 0.1415 | (1 0 6)  | 2.5724 | C 1 2/c 1   | SnCd <sub>0.015</sub> (C <sub>2</sub> O <sub>4</sub> ) <sub>0.44</sub> (DMF) <sub>1.61</sub> |
| 35.16             | 460         | 0.15   | (0 2 1)  | 2.5516 | C 1 2/c 1   | SnCd <sub>0.015</sub> (C <sub>2</sub> O <sub>4</sub> ) <sub>0.44</sub> (DMF) <sub>1.61</sub> |
| 35.66             | 310         | 0.1415 | (301)    | 2.5717 | C 1 2/c 1   | SnCd <sub>0.015</sub> (C <sub>2</sub> O <sub>4</sub> ) <sub>0.44</sub> (DMF) <sub>1.61</sub> |
| 36.93             | 366.1       | 0.224  | (2 2 -1) | 2.4324 | C 1 2/c 1   | SnCd <sub>0.015</sub> (C <sub>2</sub> O <sub>4</sub> ) <sub>0.44</sub> (DMF) <sub>1.61</sub> |
| 37.6              | 355.6       | 0.1213 | (3 1 -3) | 2.3913 | C 1 2/c 1   | SnCd <sub>0.015</sub> (C <sub>2</sub> O <sub>4</sub> ) <sub>0.44</sub> (DMF) <sub>1.61</sub> |
| 38.25             | 311.3       | 0.1213 | (1 4 0)  | 2.3506 | P 21 21 21  | SnCd <sub>0.015</sub> (C <sub>2</sub> O <sub>4</sub> ) <sub>0.55</sub> (DMF) <sub>1.72</sub> |
| 38.75             | 248.48      | 0.1415 | (-1 1 3) | 2.3265 | C 1 2/c 1   | SnCd <sub>0.015</sub> (C <sub>2</sub> O <sub>4</sub> ) <sub>0.44</sub> (DMF) <sub>1.61</sub> |
| 40.25             | 155.96      | 0.1514 | (0 0 8)  | 2.2404 | P 21 21 21  | SnCd <sub>0.015</sub> (C <sub>2</sub> O <sub>4</sub> ) <sub>0.55</sub> (DMF) <sub>1.72</sub> |
| 42.62             | 120         | 0.1416 | (4 0 0)  | 2.1213 | C 1 2/c 1   | SnCd <sub>0.015</sub> (C <sub>2</sub> O <sub>4</sub> ) <sub>0.44</sub> (DMF) <sub>1.61</sub> |
| 43.11             | 127         | 0.142  | (1 2 7)  | 2.098  | P 21 21 21  | SnCd <sub>0.015</sub> (C <sub>2</sub> O <sub>4</sub> ) <sub>0.55</sub> (DMF) <sub>1.72</sub> |
| 44.42             | 113         | 0.1415 | (3 1 1)  | 2.0395 | P 21 21 21  | SnCd <sub>0.015</sub> (C <sub>2</sub> O <sub>4</sub> ) <sub>0.55</sub> (DMF) <sub>1.72</sub> |
| 45.03             | 156         | 0.1415 | (-2 0 4) | 2.0134 | C 1 2/c 1   | SnCd <sub>0.015</sub> (C <sub>2</sub> O <sub>4</sub> ) <sub>0.44</sub> (DMF) <sub>1.61</sub> |
| 45.31             | 163.4       | 0.2224 | (2 2 1)  | 2.0014 | C 1 2/c 1   | SnCd <sub>0.015</sub> (C <sub>2</sub> O <sub>4</sub> ) <sub>0.44</sub> (DMF) <sub>1.61</sub> |

Table S4 (cont.) DRX indexed peaks and crystallographic data of SnCd<sub>0.50</sub>Ox MOF.

| $^{\circ}2\theta$ | Peak height | FWHM   | (H k l)  | d Å    | Space Group | Chemical Formula                                                                             |
|-------------------|-------------|--------|----------|--------|-------------|----------------------------------------------------------------------------------------------|
| 46.88             | 169.6       | 0.2224 | (2 0 6)  | 1.9381 | P 21 21 21  | SnCd <sub>0.015</sub> (C <sub>2</sub> O <sub>4</sub> ) <sub>0.55</sub> (DMF) <sub>1.72</sub> |
| 47.82             | 111         | 0.142  | (2 1 6)  | 1.902  | P 21 21 21  | SnCd <sub>0.015</sub> (C <sub>2</sub> O <sub>4</sub> ) <sub>0.55</sub> (DMF) <sub>1.72</sub> |
| 50.38             | 235         | 0.404  | (1 1 3)  | 1.8113 | C 1 2/c 1   | SnCd <sub>0.015</sub> (C <sub>2</sub> O <sub>4</sub> ) <sub>0.44</sub> (DMF) <sub>1.61</sub> |
| 50.87             | 221.4       | 0.4651 | (4 2 -3) | 1.7945 | C 1 2/c 1   | SnCd <sub>0.015</sub> (C <sub>2</sub> O <sub>4</sub> ) <sub>0.44</sub> (DMF) <sub>1.61</sub> |
| 50.94             | 222.5       | 0.425  | (2 3 5)  | 1.9727 | P 21 21 21  | SnCd <sub>0.015</sub> (C <sub>2</sub> O <sub>4</sub> ) <sub>0.55</sub> (DMF) <sub>1.72</sub> |
| 51.13             | 177.6       | 0.579  | (0 0 10) | 1.7863 | P 21 21 21  | SnCd <sub>0.015</sub> (C <sub>2</sub> O <sub>4</sub> ) <sub>0.55</sub> (DMF) <sub>1.72</sub> |
| 51.48             | 201.3       | 0.6    | (0 6 0)  | 1.775  | P 21 21 21  | SnCd <sub>0.015</sub> (C <sub>2</sub> O <sub>4</sub> ) <sub>0.55</sub> (DMF) <sub>1.72</sub> |
| 51.61             | 151.9       | 0.49   | (-1 1 4) | 1.7707 | C 1 2/c 1   | SnCd <sub>0.015</sub> (C <sub>2</sub> O <sub>4</sub> ) <sub>0.44</sub> (DMF) <sub>1.61</sub> |
| 52.56             | 158.5       | 0.6268 | (3 1 4)  | 1.7409 | C 1 2/c 1   | SnCd <sub>0.015</sub> (C <sub>2</sub> O <sub>4</sub> ) <sub>0.44</sub> (DMF) <sub>1.61</sub> |

Table S5. DRX indexed peaks and crystallographic data of SnCd<sub>0.75</sub>Ox MOF.

| $^{\circ}2\theta$ | Peak height | FWHM   | (H k l)  | d Å    | Space Group | Chemical Formula                                                                            |
|-------------------|-------------|--------|----------|--------|-------------|---------------------------------------------------------------------------------------------|
| 12.58             | 1000        | 0.0809 | (0 1 2)  | 7.0372 | P 21 21 21  | SnCd <sub>0.3</sub> (C <sub>2</sub> O <sub>4</sub> ) <sub>0.51</sub> (DMF) <sub>1.46</sub>  |
| 14.7              | 650         | 0.1011 | (0 1 0)  | 6.0272 | P m n a     | CdSn <sub>0.13</sub> (C <sub>2</sub> O <sub>4</sub> ) <sub>0.5</sub> (DMF) <sub>0.51</sub>  |
| 15.05             | 649.4       | 0.1011 | (1 0 1)  | 5.8857 | P m n a     | CdSn <sub>0.13</sub> (C <sub>2</sub> O <sub>4</sub> ) <sub>0.5</sub> (DMF) <sub>0.51</sub>  |
| 17.58             | 100         | 0.1011 | (0 1 1)  | 5.0457 | P m n a     | CdSn <sub>0.13</sub> (C <sub>2</sub> O <sub>4</sub> ) <sub>0.5</sub> (DMF) <sub>0.51</sub>  |
| 19.24             | 335         | 0.1213 | (1 1 0)  | 4.613  | C 1 2/c 1   | SnCd <sub>0.05</sub> (C <sub>2</sub> O <sub>4</sub> ) <sub>0.36</sub> (DMF) <sub>1.84</sub> |
| 19.62             | 137         | 0.1011 | (1 1 -1) | 4.5259 | C 1 2/c 1   | SnCd <sub>0.05</sub> (C <sub>2</sub> O <sub>4</sub> ) <sub>0.36</sub> (DMF) <sub>1.84</sub> |
| 19.85             | 137         | 0.1011 | (0 0 4)  | 4.4703 | P 21 21 21  | SnCd <sub>0.3</sub> (C <sub>2</sub> O <sub>4</sub> ) <sub>0.51</sub> (DMF) <sub>1.46</sub>  |
| 20.98             | 221         | 0.1011 | (2 0 0)  | 3.9713 | C 1 2/c 1   | SnCd <sub>0.05</sub> (C <sub>2</sub> O <sub>4</sub> ) <sub>0.36</sub> (DMF) <sub>1.84</sub> |
| 24.27             | 198.7       | 0.1415 | (0 1 2)  | 3.6671 | P m n a     | CdSn <sub>0.13</sub> (C <sub>2</sub> O <sub>4</sub> ) <sub>0.5</sub> (DMF) <sub>0.51</sub>  |
| 24.98             | 178.5       | 0.0809 | (1 2 1)  | 3.5648 | P 21 21 21  | SnCd <sub>0.3</sub> (C <sub>2</sub> O <sub>4</sub> ) <sub>0.51</sub> (DMF) <sub>1.46</sub>  |
| 25.3              | 401.2       | 0.2224 | (0 3 1)  | 3.5209 | P 21 21 21  | SnCd <sub>0.3</sub> (C <sub>2</sub> O <sub>4</sub> ) <sub>0.51</sub> (DMF) <sub>1.46</sub>  |
| 26.62             | 347.8       | 0.4651 | (1 1 1)  | 3.3482 | C 1 2/c 1   | SnCd <sub>0.05</sub> (C <sub>2</sub> O <sub>4</sub> ) <sub>0.36</sub> (DMF) <sub>1.84</sub> |
| 27.49             | 362.34      | 0.1011 | (-1 1 2) | 3.245  | C 1 2/c 1   | SnCd <sub>0.05</sub> (C <sub>2</sub> O <sub>4</sub> ) <sub>0.36</sub> (DMF) <sub>1.84</sub> |
| 28.7              | 276.9       | 0.1011 | (1 2 3)  | 3.1108 | P 21 21 21  | SnCd <sub>0.3</sub> (C <sub>2</sub> O <sub>4</sub> ) <sub>0.51</sub> (DMF) <sub>1.46</sub>  |

Table S5 (cont.) DRX indexed peaks and crystallographic data of SnCd<sub>0.75</sub>Ox MOF.

| $^{\circ}2\theta$ | Peak height | FWHM    | (H k l)  | d Å    | Space Group | Chemical Formula                                                                           |
|-------------------|-------------|---------|----------|--------|-------------|--------------------------------------------------------------------------------------------|
| 29.6              | 100         | 0.1011  | (0 2 0)  | 3.0183 | P m n a     | CdSn <sub>0.13</sub> (C <sub>2</sub> O <sub>4</sub> ) <sub>0.5</sub> (DMF) <sub>0.51</sub> |
| 29.7              | 276.9       | 0.1011  | (0 3 3)  | 3.0086 | P 21 21 21  | SnCd <sub>0.3</sub> (C <sub>2</sub> O <sub>4</sub> ) <sub>0.51</sub> (DMF) <sub>1.46</sub> |
| 31.17             | 183         | 0.0809  | (0 2 1)  | 2.8691 | P m n a     | CdSn <sub>0.13</sub> (C <sub>2</sub> O <sub>4</sub> ) <sub>0.5</sub> (DMF) <sub>0.51</sub> |
| 31.26             | 277.5       | 0.0607  | (0 1 6)  | 2.8613 | P 21 21 21  | SnCd <sub>0.3</sub> (C <sub>2</sub> O <sub>4</sub> ) <sub>0.51</sub> (DMF) <sub>1.46</sub> |
| 31.43             | 110.8       | 0.1011  | (1 0 3)  | 2.8462 | P m n a     | CdSn <sub>0.13</sub> (C <sub>2</sub> O <sub>4</sub> ) <sub>0.5</sub> (DMF) <sub>0.51</sub> |
| 31.47             | 221         | 0.1011  | (1 2 4)  | 2.8223 | P 21 21 21  | SnCd <sub>0.3</sub> (C <sub>2</sub> O <sub>4</sub> ) <sub>0.51</sub> (DMF) <sub>1.46</sub> |
| 34.42             | 204.2       | 0.3842  | (1 3 3)  | 2.6057 | P 21 21 21  | SnCd <sub>0.3</sub> (C <sub>2</sub> O <sub>4</sub> ) <sub>0.51</sub> (DMF) <sub>1.46</sub> |
| 35.2              | 144         | 0.1618  | (2 0 0)  | 2.5494 | P 21 21 21  | SnCd <sub>0.3</sub> (C <sub>2</sub> O <sub>4</sub> ) <sub>0.51</sub> (DMF) <sub>1.46</sub> |
| 36.77             | 107.4       | 0.1213  | (2 0 2)  | 2.4446 | P 21 21 21  | SnCd <sub>0.3</sub> (C <sub>2</sub> O <sub>4</sub> ) <sub>0.51</sub> (DMF) <sub>1.46</sub> |
| 37.16             | 99.4        | 0.1213  | (0 4 3)  | 2.4199 | P 21 21 21  | SnCd <sub>0.3</sub> (C <sub>2</sub> O <sub>4</sub> ) <sub>0.51</sub> (DMF) <sub>1.46</sub> |
| 37.64             | 71.1        | 0.1618  | (2 1 2)  | 2.3896 | P 21 21 21  | SnCd <sub>0.3</sub> (C <sub>2</sub> O <sub>4</sub> ) <sub>0.51</sub> (DMF) <sub>1.46</sub> |
| 37.84             | 25          | 0.1011  | (3 0 1)  | 2.3778 | P m n a     | CdSn <sub>0.13</sub> (C <sub>2</sub> O <sub>4</sub> ) <sub>0.5</sub> (DMF) <sub>0.51</sub> |
| 38.35             | 50          | 0.1011  | (2 0 3)  | 2.3473 | P 21 21 21  | SnCd <sub>0.3</sub> (C <sub>2</sub> O <sub>4</sub> ) <sub>0.51</sub> (DMF) <sub>1.46</sub> |
| 38.75             | 25          | 0.1011  | (2 2 -2) | 2.324  | P m n a     | CdSn <sub>0.13</sub> (C <sub>2</sub> O <sub>4</sub> ) <sub>0.5</sub> (DMF) <sub>0.51</sub> |
| 40.3              | 50          | 0.1011  | (0 0 8)  | 2.2381 | P 21 21 21  | SnCd <sub>0.3</sub> (C <sub>2</sub> O <sub>4</sub> ) <sub>0.51</sub> (DMF) <sub>1.46</sub> |
| 41                | 20          | 0.1011  | (2 1 3)  | 2.2015 | P m n a     | CdSn <sub>0.13</sub> (C <sub>2</sub> O <sub>4</sub> ) <sub>0.5</sub> (DMF) <sub>0.51</sub> |
| 43.15             | 30          | 0.1011  | (1 2 7)  | 2.0967 | P 21 21 21  | SnCd <sub>0.3</sub> (C <sub>2</sub> O <sub>4</sub> ) <sub>0.51</sub> (DMF) <sub>1.46</sub> |
| 43.64             | 30          | 0.1011  | (0 3 7)  | 2.0743 | P 21 21 21  | SnCd <sub>0.3</sub> (C <sub>2</sub> O <sub>4</sub> ) <sub>0.51</sub> (DMF) <sub>1.46</sub> |
| 44.45             | 20          | 0.1011  | (2 1 5)  | 2.0383 | P 21 21 21  | SnCd <sub>0.3</sub> (C <sub>2</sub> O <sub>4</sub> ) <sub>0.51</sub> (DMF) <sub>1.46</sub> |
| 45.34             | 30          | 0.1011  | (0 5 3)  | 2.0004 | P 21 21 21  | SnCd <sub>0.3</sub> (C <sub>2</sub> O <sub>4</sub> ) <sub>0.51</sub> (DMF) <sub>1.46</sub> |
| 46.18             | 30          | 0.1011  | (0 3 1)  | 1.9659 | P m n a     | CdSn <sub>0.13</sub> (C <sub>2</sub> O <sub>4</sub> ) <sub>0.5</sub> (DMF) <sub>0.51</sub> |
| 49.44             | 25          | 0.1011  | (0 4 7)  | 1.8436 | P 21 21 21  | SnCd <sub>0.3</sub> (C <sub>2</sub> O <sub>4</sub> ) <sub>0.51</sub> (DMF) <sub>1.46</sub> |
| 49.87             | 172.3       | 0.1618  | (3 1 3)  | 1.8286 | P m n a     | CdSn <sub>0.13</sub> (C <sub>2</sub> O <sub>4</sub> ) <sub>0.5</sub> (DMF) <sub>0.51</sub> |
| 50.03             | 72.3        | 0.04044 | (2 2 6)  | 1.8233 | P 21 21 21  | SnCd <sub>0.3</sub> (C <sub>2</sub> O <sub>4</sub> ) <sub>0.51</sub> (DMF) <sub>1.46</sub> |
| 51.22             | 186.1       | 0.05257 | (1 2 4)  | 1.7837 | P m n a     | CdSn <sub>0.13</sub> (C <sub>2</sub> O <sub>4</sub> ) <sub>0.5</sub> (DMF) <sub>0.51</sub> |
| 51.56             | 134.6       | 0.065   | (1 3 8)  | 1.7727 | P 21 21 21  | SnCd <sub>0.3</sub> (C <sub>2</sub> O <sub>4</sub> ) <sub>0.51</sub> (DMF) <sub>1.46</sub> |
| 52                | 130.7       | 0.055   | (2 4 3)  | 1.7585 | P 21 21 21  | SnCd <sub>0.3</sub> (C <sub>2</sub> O <sub>4</sub> ) <sub>0.51</sub> (DMF) <sub>1.46</sub> |
| 52.3              | 99.8        | 0.059   | (1 2 9)  | 1.7491 | P 21 21 21  | SnCd <sub>0.3</sub> (C <sub>2</sub> O <sub>4</sub> ) <sub>0.51</sub> (DMF) <sub>1.46</sub> |

Table S6. Derived empirical formulae from results of elemental analysis of MOFs samples using EDS. Data used to calculate the multiphase sample formulae was asterisked.

| Sample      | Element | At1 % | At2 % | At3 % | At4 % | At5 % | Average At. %    | Average atomic ratio | Empirical Formula                                                                                                                                                                                                                                                                                                                                         |
|-------------|---------|-------|-------|-------|-------|-------|------------------|----------------------|-----------------------------------------------------------------------------------------------------------------------------------------------------------------------------------------------------------------------------------------------------------------------------------------------------------------------------------------------------------|
| Cd-Ox       | C       | 29.74 | 31.68 | -     | -     | -     | 30.71 (±1.4)     | 1.86                 | Cd(C <sub>2</sub> O <sub>4</sub> ) <sub>0.8</sub><br>(orthorrombic)                                                                                                                                                                                                                                                                                       |
|             | O       | 51.98 | 53.54 | -     | -     | -     | 52.76 (±1.1)     | 3.19                 |                                                                                                                                                                                                                                                                                                                                                           |
|             | Cd      | 18.29 | 14.79 | -     | -     | -     | 16.54 (±2.5)     | 1                    |                                                                                                                                                                                                                                                                                                                                                           |
| Sn-Ox       | C       | 22.46 | 22.3  | 23.51 | -     | -     | 22.75 (±0.7)     | 2.03                 | Sn(C <sub>2</sub> O <sub>4</sub> ) <sub>0.45</sub> (DMF) <sub>1.51</sub><br>(monoclinic)                                                                                                                                                                                                                                                                  |
|             | O       | 48.14 | 49.52 | 49.21 | -     | -     | 48.95 (±0.7)     | 4.37                 |                                                                                                                                                                                                                                                                                                                                                           |
|             | Sn      | 12.6  | 11.13 | 10.17 | -     | -     | 11.3 (±1.1)      | 1                    |                                                                                                                                                                                                                                                                                                                                                           |
|             | N       | 16.81 | 17.05 | 17.11 | -     | -     | 17.1(±0.16)      | 1.51                 |                                                                                                                                                                                                                                                                                                                                                           |
| SnCd0.25-Ox | C       | 14.26 | 22.62 | 17.79 | 22.17 | 23.2  | 20.0 (±3.86)     | 1.86                 | SnCd <sub>0.011</sub> (C <sub>2</sub> O <sub>4</sub> ) <sub>0.45</sub> (DMF) <sub>1.23</sub><br>(monoclinic)                                                                                                                                                                                                                                              |
|             | O       | 50.07 | 46.21 | 48.32 | 48.08 | 48.93 | 48.32(±1.04)     | 3.98                 |                                                                                                                                                                                                                                                                                                                                                           |
|             | Cd      | 0.25  | 0.35  | 0.24  | 0.14  | 0.12  | 0.22(±0.89)      | 0.011                |                                                                                                                                                                                                                                                                                                                                                           |
|             | Sn      | 14.52 | 16.07 | 15.62 | 12.73 | 11.64 | 14.11(±1.89)     | 1                    |                                                                                                                                                                                                                                                                                                                                                           |
|             | N       | 20.89 | 14.76 | 18.02 | 16.88 | 13.11 | 16.73(±2.99)     | 1.23                 |                                                                                                                                                                                                                                                                                                                                                           |
| SnCd0.50-Ox |         | *     | *     | **    | **    | **    | <b>Aver. at.</b> | <b>ratio</b>         | **SnCd <sub>0.015</sub> (C <sub>2</sub> O <sub>4</sub> ) <sub>0.44</sub> (DMF) <sub>1.61</sub><br>(monoclinic)<br><br>*SnCd <sub>0.015</sub> (C <sub>2</sub> O <sub>4</sub> ) <sub>0.55</sub> (DMF) <sub>1.72</sub><br>(orthorrombic)                                                                                                                     |
|             | C       | 16.87 | 18.1  | 21.8  | 23.63 | 22.17 | *                | **                   |                                                                                                                                                                                                                                                                                                                                                           |
|             | O       | 50.35 | 51.7  | 48.14 | 47.99 | 49.73 | 1.52             | 2.06                 |                                                                                                                                                                                                                                                                                                                                                           |
|             | Cd      | 0.22  | 0.13  | 0.21  | 0.17  | 0.11  | 4.45             | 4.44                 |                                                                                                                                                                                                                                                                                                                                                           |
|             | Sn      | 12.65 | 10.51 | 12.78 | 10.07 | 10.36 | 0.015            | 0.015                |                                                                                                                                                                                                                                                                                                                                                           |
| N           | 19.92   | 19.56 | 17.07 | 18.15 | 17.62 | 1     | 1                | 1.72                 | 1.61                                                                                                                                                                                                                                                                                                                                                      |
| SnCd0.75-Ox | C       | *     | **    | *     | ***   |       | * **             | ***                  | *SnCd <sub>0.05</sub> (C <sub>2</sub> O <sub>4</sub> ) <sub>0.36</sub> (DMF) <sub>1.84</sub><br>(monoclinic)<br><br>**SnCd <sub>0.3</sub> (C <sub>2</sub> O <sub>4</sub> ) <sub>0.51</sub> (DMF) <sub>1.46</sub><br>(orthorrombic)<br><br>***CdSn <sub>0.13</sub> (C <sub>2</sub> O <sub>4</sub> ) <sub>0.5</sub> (DMF) <sub>0.51</sub><br>(orthorrombic) |
|             | O       | 24.32 | 17.84 | 21.89 | 27.85 |       | 2.2 1.43         | 1.64                 |                                                                                                                                                                                                                                                                                                                                                           |
|             | Cd      | 46.03 | 47.78 | 46.77 | 44.3  |       | 4.4 3.84         | 2.61                 |                                                                                                                                                                                                                                                                                                                                                           |
|             | Sn      | 0.52  | 3.82  | 0.54  | 16.97 |       | 0.05 0.3         | 1                    |                                                                                                                                                                                                                                                                                                                                                           |
|             | N       | 10.12 | 12.44 | 11    | 2.22  |       | 1 1              | 0.13                 |                                                                                                                                                                                                                                                                                                                                                           |
|             | N       | 19.01 | 18.13 | 19.8  | 8.66  |       | 1.84 1.46        | 0.51                 |                                                                                                                                                                                                                                                                                                                                                           |



## 2. Additional voltammetric testing of MOF catalysts

To assess catalyst stability, cyclic voltammetry was performed in nitrogen-saturated 0.1 M KOH. Ten cycles of voltammetry were measured at a scan rate of  $1 \text{ V s}^{-1}$  to ensure the stability of the materials. Figure S1 shows that no changes occur during the voltammetric test, for example SnCd0.75-Ox MOF, and no changes are observed in the faradaic current of the chronoamperometric test.

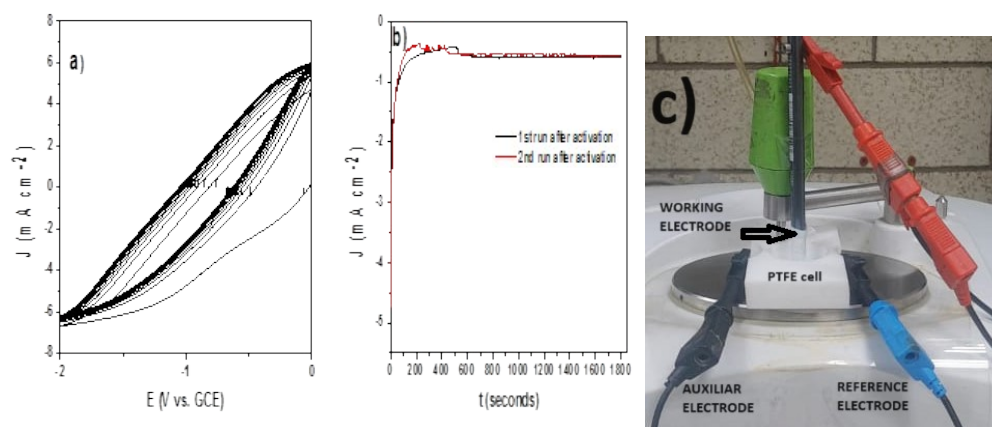

**Figure S1.** Stability tests to observe any material leaching or instability of the SnCd0.25-Ox sample. a) Activation cycles for the electrodes with  $E_i = 0 \text{ V}$ ,  $E_1 = -2 \text{ V}$ ,  $E_2 = 0 \text{ V}$ , and  $\nu = 1 \text{ V s}^{-1}$  and b) Chronoamperogram of the electrocatalysts measured at a cathodic potential of potential  $-0.5 \text{ V}$  vs Ag/AgCl for a period of 30 min. c) The PTFE cell used for spectroelectrochemical experiments.

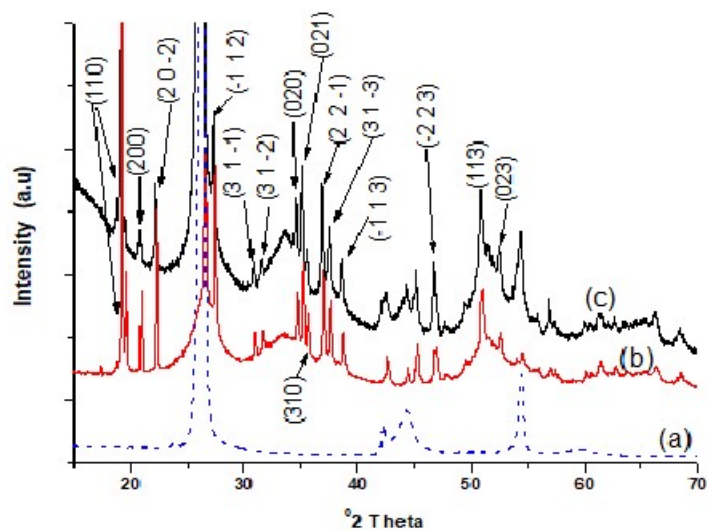

**Figure S2.** a) DRX pattern of graphite plate substrate. b) DRX pattern of SnCd<sub>0.25</sub>-Ox MOF sample. c) DRX diffraction pattern of graphite substrate coated with the SnCd<sub>0.25</sub>-Ox MOF sample measured after the activation cycles for the electrodes with  $E_i = 0\text{ V}$ ,  $E_1 = -2\text{ V}$ ,  $E_2 = 0\text{ V}$ , and  $\nu = 1\text{ V s}^{-1}$ .

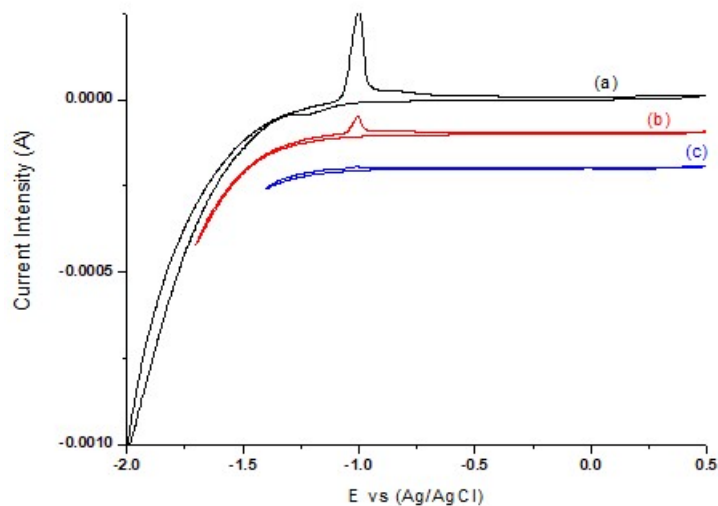

**Figure S3.** Voltammetric tests in 0.1M KOH medium using the catalyst Sn -Ox. a)  $E_i = 0\text{ V}$ ,  $E_1 = -2\text{ V}$ ,  $E_2 = 0\text{ V}$ , and  $\nu = 0.05\text{ V s}^{-1}$ . b)  $E_i = 0\text{ V}$ ,  $E_1 = -1.7\text{ V}$ ,  $E_2 = 0\text{ V}$ , and  $\nu = 0.05\text{ V s}^{-1}$ . c)  $E_i = 0\text{ V}$ ,  $E_1 = -1.5\text{ V}$ ,  $E_2 = 0\text{ V}$ , and  $\nu = 0.05\text{ V s}^{-1}$ . From the figure, it can be seen that the peak of the oxidation of the produced hydrogen decreases when the applied return potential is limited.

**Table S7.** Total organic carbon results from aqueous samples recovered from KOH 0.1M supporting electrolyte used in chronoamperometric experiments at -1.5V.

| Aqueous Sample                                             | Total Organic Carbon (mg/L) $\pm 0.3$ |
|------------------------------------------------------------|---------------------------------------|
| KOH 0.1M blank, degassed and saturated with N <sub>2</sub> | 4.63                                  |
| KOH 0.1M from hydrolysis with Sn-Ox                        | 4.53                                  |
| KOH 0.1M from hydrolysis with Sn-Cd <sub>0.25</sub> Ox     | 4.47                                  |
| KOH 0.1M from hydrolysis with Sn-Cd <sub>0.5</sub> Ox      | 4.32                                  |
| KOH 0.1M from hydrolysis with Sn-Cd <sub>0.75</sub> Ox     | 4.32                                  |

### 3. Additional Spectroelectrochemistry testing of MOF catalysts

To ensure that the CO<sub>2</sub>RR is carried out at -1.5 V, another spectroelectrochemical analysis was performed at a potential that showed a capacitive current rather than faradic (-0.77 V).

In Figure S4, ATR-FTIR spectra is shown for the electrocatalysts (a) SnCd<sub>0.25</sub>-Ox, (b) SnCd<sub>0.50</sub>-Ox, and (c) SnCd<sub>0.75</sub>-Ox, where we can observe a negative band at 2341 cm<sup>-1</sup> for all three electrocatalysts, this band is attributed to the asymmetric

stretching mode of  $\text{CO}_2$  dissolved in the aqueous electrolyte. The negative intensity of the band is due to the decrease in concentration in solution. This is generally caused by  $\text{CO}_2$  adsorbing on the catalyst or reducing it to other species. In Fig. S3a we observe the formation of some negative bands at 3675  $\text{cm}^{-1}$ , 2901 and 2988  $\text{cm}^{-1}$ . This feature is attributed to a slight increase in the O-H vibration of alkaline media, caused by a decrease in the previously dissolved  $\text{CO}_2$ . This was observed together with the appearance of negative bands associated with the adsorption of carbonate on the catalyst at 1431, 1320, 1116  $\text{cm}^{-1}$ , and 885  $\text{cm}^{-1}$ . On the other hand, Figs. S3b-c shows that for the  $\text{SnCd}_{0.50}\text{-Ox}$  and  $\text{SnCd}_{0.75}\text{-Ox}$  catalysts, the incipient CO formation occurs as a product of  $\text{CO}_2$  reduction, as evidenced by the bands at 1100  $\text{cm}^{-1}$ .

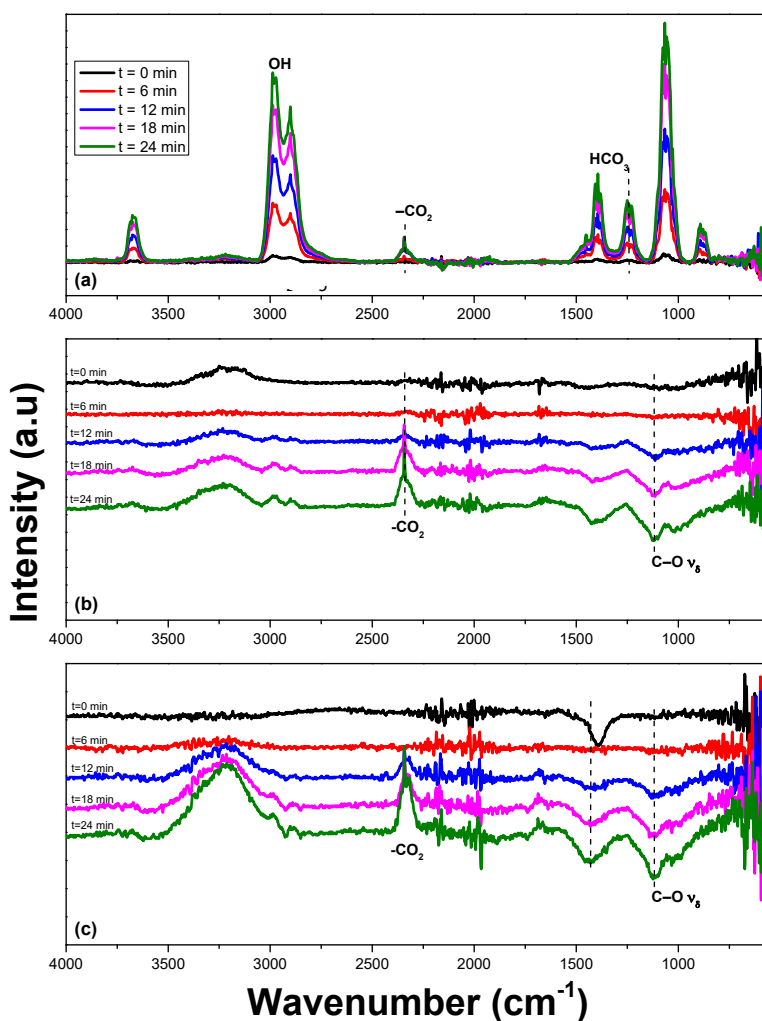

**Figure S4.** FTIR spectra of  $\text{CO}_2$ RR products obtained with electrocatalysts: (a)  $\text{SnCd}_{0.25}\text{-Ox}$ , (b)  $\text{SnCd}_{0.50}\text{-Ox}$ , and (c)  $\text{SnCd}_{0.75}\text{-Ox}$ , measured in a rich  $\text{CO}_2$  atmosphere at a cathodic potential of  $-0.77$  V.
